# Supplementary material
Source: publisher figshare collection journal article supplement (https://tandf.figshare.com/ndownloader/files/17811596)
Supplement: Supplementary file 1 [file 17811596]

## Supplementary figure

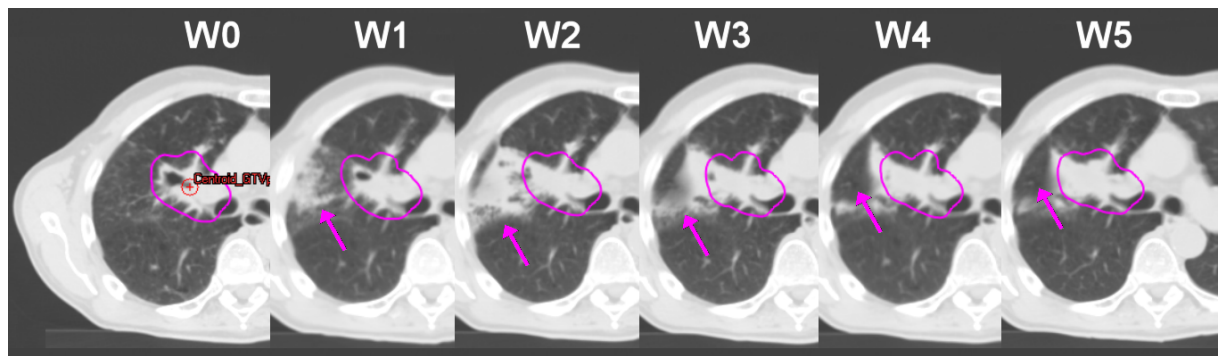

Weekly imaging of a patient who needed re-planning two times due to a dense mass in the lung that changed size, shape, density and location each week.
